# Supplementary material for: Probing the cooperative mechanism of the μ–δ opioid receptor heterodimer by multiscale simulation
Source: Royal Society of Chemistry journal article supplement (doi:10.1039/c8cp06652c), 2018-01-01
Supplement: c8cp06652c1.pdf [file c8cp06652c1.pdf]

# Supporting Information

## Probing the cooperative mechanism of the $\mu$ - $\delta$ opioid receptor heterodimer by multiscale simulation

Longrong Wang,<sup>a</sup> Yuan Yuan,<sup>b</sup> Xin Chen,<sup>a</sup> Jianfang Chen,<sup>a</sup> Yanzhi Guo,<sup>a</sup> Menglong Li,<sup>a</sup> Chuan Li<sup>c</sup> and Xuemei Pu<sup>\*a</sup>

- <sup>a</sup> Faculty of Chemistry, Sichuan University, Chengdu, Sichuan 610064; People's Republic of China.
- <sup>b</sup> College of Management, Southwest University for Nationalities, Chengdu 610041, P. R. China
- <sup>c</sup> College of Computer Science, Sichuan University, Chengdu, Sichuan 610064, P. R. China
- \* E-mail address: [xmpuscu@scu.edu.cn](mailto:xmpuscu@scu.edu.cn)

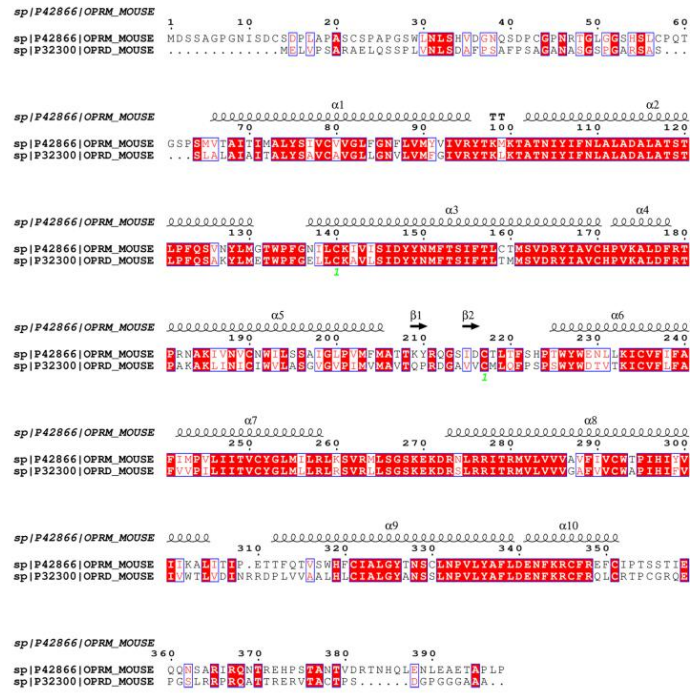

**Fig S1.** The sequence similarity and secondary structure information from aligned sequences between  $\mu$ -OR and  $\delta$ -OR. Sequences with similar scores greater than 0.7 are rendered as white characters on the red background. Strictly conserved residues are in the column with blue frames.

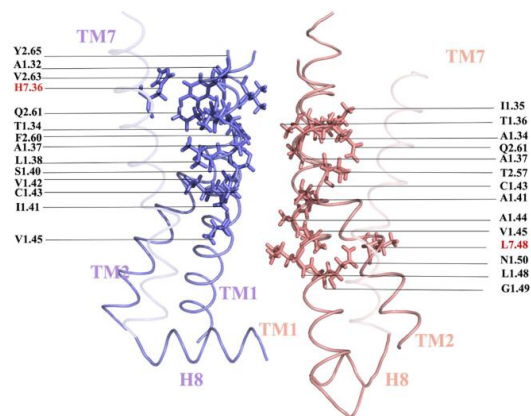

**I-I dimer**

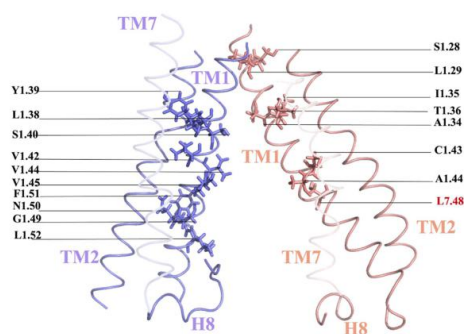

**A-I dimer**

**Fig. S2** Interface hot spots in the  $\mu$ - $\delta$  heterodimers. The interface of TM1-TM2-H8 between the two protomers is shown, in which the  $\mu$ -OR and  $\delta$ -OR are represented by purple and salmon pink, respectively. Light purple and light pink denote TM7s of the two subunits, respectively. Hot spots are displayed in sticks and shown in bold font, in which ones on TM7 are highlighted in red (e.g., H7.36 and L7.48 for the I-I dimer, L7.48 for the A-I dimer).

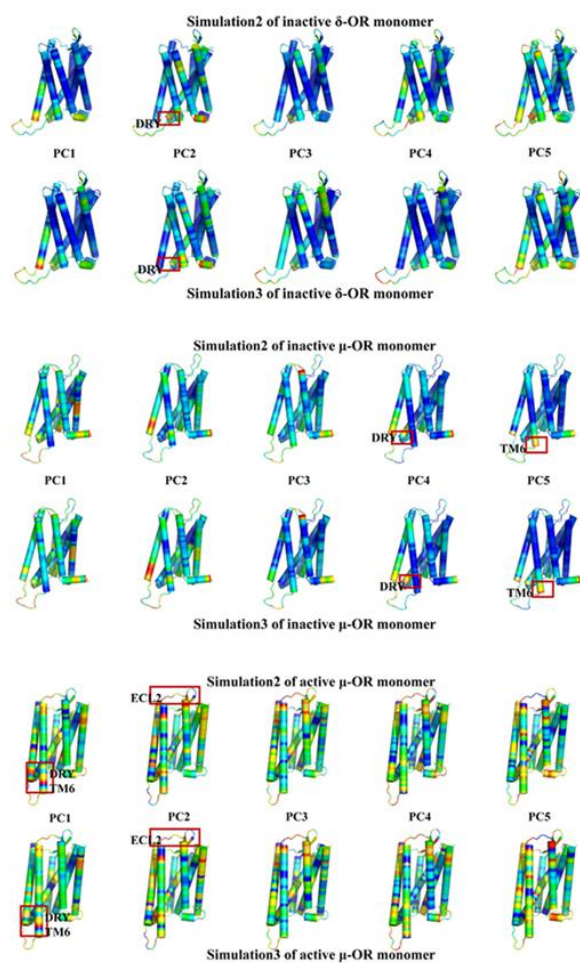

**Fig S3.** The projection of the first five eigenvectors for the other two parallel simulations (e.g., simulation 2 and simulation 3) with the exception of simulation 1 in the text for the monomers. The colours from red to blue correspond to the mobility from large to small.

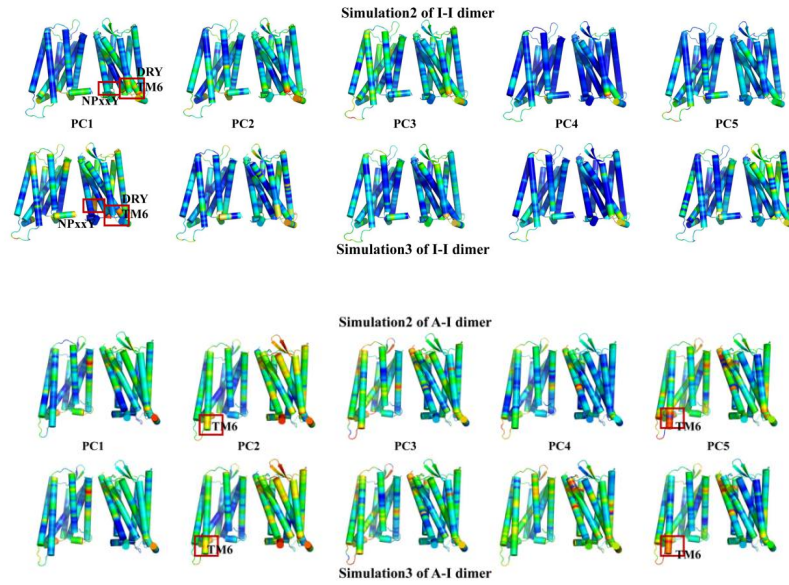

**Fig S4.** The projection of the first five eigenvectors for the other two parallel simulations (e.g., simulation 2 and simulation 3) with the exception of simulation 1 in text for the dimers. The colours from red to blue correspond to the mobility from large to small.

**Table S1.** The high correlated regions with the absolute values of correlation coefficients larger than 0.6 for the receptor in the seven systems, derived from the last 100 ns trajectories of the three parallel all-atom MD simulations with 200 ns simulation times.

| System                                      | Simulation 1 | Simulation 2 | Simulation 3 |
|---------------------------------------------|--------------|--------------|--------------|
| Inactive $\delta$ -OR monomer               | TM2-TM4      | TM2-TM4      | TM2-TM4      |
|                                             | TM3-ECL2     | TM3-ECL2     | TM1-TM7      |
|                                             | TM1-TM7      | TM2-TM7      | TM5-TM6      |
|                                             | TM5-TM6      | TM5-TM6      | TM6-TM7      |
|                                             | TM6-TM7      | TM6-TM7      |              |
| Inactive $\delta$ -OR monomer               | TM5-TM6      | TM5-TM6      | TM5-TM6      |
|                                             | TM2-TM4      | TM2-TM4      | TM2-TM4      |
|                                             | TM1-TM6      | TM1-TM6      |              |
| Active $\mu$ -OR monomer                    | TM5-TM6      |              | TM5-TM6      |
|                                             | TM3-TM6      | TM3-TM6      | TM3-TM6      |
|                                             | TM1-TM7      | TM1-TM7      | TM1-TM7      |
| Inactive $\delta$ -OR protomer of I-I dimer | TM5-TM6      | TM5-TM6      | TM5-TM6      |
|                                             | TM2-TM3      | TM2-TM3      | TM2-TM3      |
|                                             | TM2-TM4      | TM2-TM4      |              |
| Inactive $\mu$ -OR protomer of I-I dimer    | TM2-TM4      | TM2-TM4      | TM2-TM4      |
|                                             | TM3-TM6      | TM3-TM6      | TM3-TM6      |
|                                             | TM2-TM6      | TM2-TM6      | TM2-TM6      |
| Inactive $\delta$ -OR protomer of A-I dimer | TM3-TM6      | TM3-TM6      | TM3-TM6      |
|                                             | TM3-TM4      | TM3-TM4      | TM3-TM4      |
|                                             | TM3-TM5      | TM3-TM5      | TM3-TM5      |
|                                             | TM3-ECL2     |              | TM3-ECL2     |
| Active $\mu$ -OR protomer of A-I dimer      | TM2-TM7      | TM2-TM7      | TM2-TM7      |

**Table S2.** The highest frequency of the pathway from the ligand-binding pocket to the G-protein binding region for the three parallel MDs.

| Systems                                     | Simulation 1 | Simulation 2 | Simulation 3 |
|---------------------------------------------|--------------|--------------|--------------|
| Inactive $\delta$ -OR monomer               | 90.3%        | 82.1%        | 89.7%        |
| Inactive $\mu$ -OR monomer                  | 89.6%        | 78.0%        | 80.5%        |
| Active $\mu$ -OR monomer                    | 85.8%        | 74.2%        | 76.1%        |
| Inactive $\delta$ -OR protomer of I-I dimer | 75.9%        | 68.6%        | 72.9%        |
| Inactive $\mu$ -OR protomer of I-I dimer    | 63.5%        | 58.3%        | 60.3%        |
| Inactive $\delta$ -OR protomer of A-I dimer | 77.1%        | 75.8%        | 68.6%        |
| Active $\mu$ -OR protomer of A-I dimer      | 64.7%        | 60.1%        | 59.3%        |

**Table S3.** The pathways from the ligand binding site to the G-protein binding pocket with the highest frequency. The residues located in the Na<sup>+</sup> and water pocket are highlighted in bold font.

| Systems                                     | Pathways                                                                                                                                                                                                                                             |
|---------------------------------------------|------------------------------------------------------------------------------------------------------------------------------------------------------------------------------------------------------------------------------------------------------|
| Inactive $\delta$ -OR monomer               | Val281 <sup>6.55</sup> -Val212 <sup>5.37</sup> -Tyr208 <sup>5.33</sup> -Phe218 <sup>5.43</sup> - <b>Trp274</b> <sup>6.48</sup> - <b>Asn310</b> <sup>7.45</sup> - <b>Asn314</b> <sup>7.49</sup> -Thr99 <sup>2.54</sup> - <b>Asn67</b> <sup>1.50</sup> |
| Inactive $\delta$ -OR protomer of I-I dimer | <b>Trp274</b> <sup>6.48</sup> -Val267 <sup>6.41</sup> - <b>Asn310</b> <sup>7.45</sup> -Val266 <sup>6.40</sup> -Tyr318 <sup>7.53</sup>                                                                                                                |
| Inactive $\delta$ -OR protomer of A-I dimer | Phe218 <sup>5.43</sup> - <b>Trp274</b> <sup>6.48</sup> - <b>Asn310</b> <sup>7.45</sup> -Leu313 <sup>7.48</sup> -Tyr308 <sup>7.43</sup>                                                                                                               |
| Inactive $\mu$ -OR monomer                  | Val236 <sup>5.42</sup> -Phe239 <sup>5.45</sup> - <b>Trp293</b> <sup>6.48</sup> -Cys292 <sup>6.47</sup> -Tyr326 <sup>7.43</sup> - <b>Asn332</b> <sup>7.49</sup>                                                                                       |
| Inactive $\mu$ -OR protomer of I-I dimer    | Ile322 <sup>7.39</sup> -Pro295 <sup>6.50</sup> -Thr327 <sup>7.44</sup> -Leu331 <sup>7.48</sup> -Val334 <sup>7.51</sup>                                                                                                                               |
| Active $\mu$ -OR monomer                    | Tyr148 <sup>3.33</sup> -Ile296 <sup>6.51</sup> - <b>Phe289</b> <sup>6.44</sup> -Cys251 <sup>5.57</sup> -Arg165 <sup>3.50</sup> -Leu339 <sup>7.56</sup> -Asp164 <sup>3.49</sup>                                                                       |
| Active $\mu$ -OR protomer of A-I dimer      | <b>Trp293</b> <sup>6.48</sup> -Ile296 <sup>6.51</sup> -Thr153 <sup>3.38</sup> -Phe156 <sup>3.41</sup> -Val285 <sup>6.40</sup> - <b>Tyr336</b> <sup>7.53</sup> -Ser162 <sup>3.47</sup> -Tyr166 <sup>3.51</sup>                                        |



**Table S4.** The highest frequency of the allosteric pathway between the two subunits in the heterodimers for the three parallel MDs.

| Systems   | Simulation 1 | Simulation 2 | Simulation 3 |
|-----------|--------------|--------------|--------------|
| I-I dimer | 57.6%        | 48.9%        | 53.7%        |
| A-I dimer | 54.3%        | 60.1%        | 52.8%        |

**Table S5.** The pathways between the two subunits with the highest frequency in the heterodimers. The residues located in the Na<sup>+</sup> and water pocket are highlighted in bold font.

| System    | Pathway                                                                                                                                                                                                                                                                                                                                                                                                     |
|-----------|-------------------------------------------------------------------------------------------------------------------------------------------------------------------------------------------------------------------------------------------------------------------------------------------------------------------------------------------------------------------------------------------------------------|
| I-I dimer | Thr279 <sup>6.34</sup> ( $\mu$ -OR)-Tyr166 <sup>3.51</sup> ( $\mu$ -OR)-Ile278 <sup>6.33</sup> ( $\mu$ -OR)- <b>Tyr336</b> <sup>7.53</sup><br>( $\mu$ -OR)-Leu69 <sup>1.52</sup> ( $\delta$ -OR)-Arg76 <sup>1.59</sup> ( $\delta$ -OR)-Ile352 <sup>8.59</sup> ( $\mu$ -OR)-Phe<br>320 <sup>7.55</sup> ( $\delta$ -OR)- <b>Asn324</b> <sup>7.49</sup> ( $\delta$ -OR)-Thr260 <sup>6.34</sup> ( $\delta$ -OR) |
| A-I dimer | Pro295 <sup>6.50</sup> ( $\mu$ -OR)-Val286 <sup>6.41</sup> ( $\mu$ -OR)- <b>Asn328</b> <sup>7.45</sup> ( $\mu$ -OR)-Thr120 <sup>2.57</sup> ( $\mu$ -OR)- <b>Asn86</b> <sup>1.50</sup> ( $\mu$ -OR)-Tyr308 <sup>7.43</sup> ( $\delta$ -OR)-Ala305 <sup>7.40</sup> ( $\delta$ -OR)-<br><b>Phe270</b> <sup>6.44</sup> ( $\delta$ -OR)- <b>Leu139</b> <sup>3.43</sup> ( $\delta$ -OR)                           |
